# Supplementary material for: Surface Modification of Cellulose Nanocrystal Films via RAFT Polymerization for Adsorption of PFAS
Source: MDPI journal article supplement (doi:10.3390/polysaccharides5020006), 2024-04-13
Supplement: s1 [file s1]

## Supplementary Information

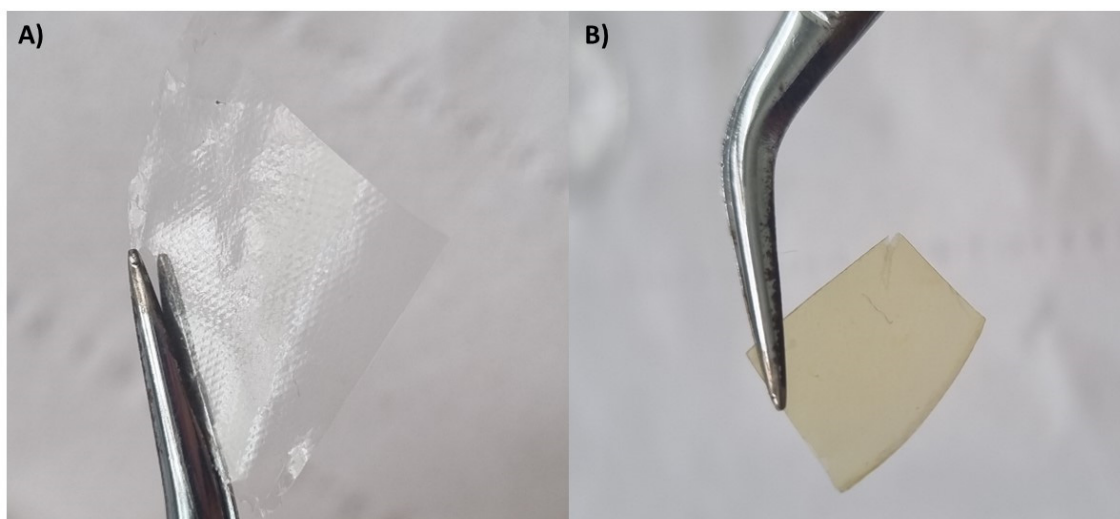

**Figure S1. Digital images of CNC film A. Before modification and B. After grafting the polymer  
(CNC-g-PTMAEMA 1)**

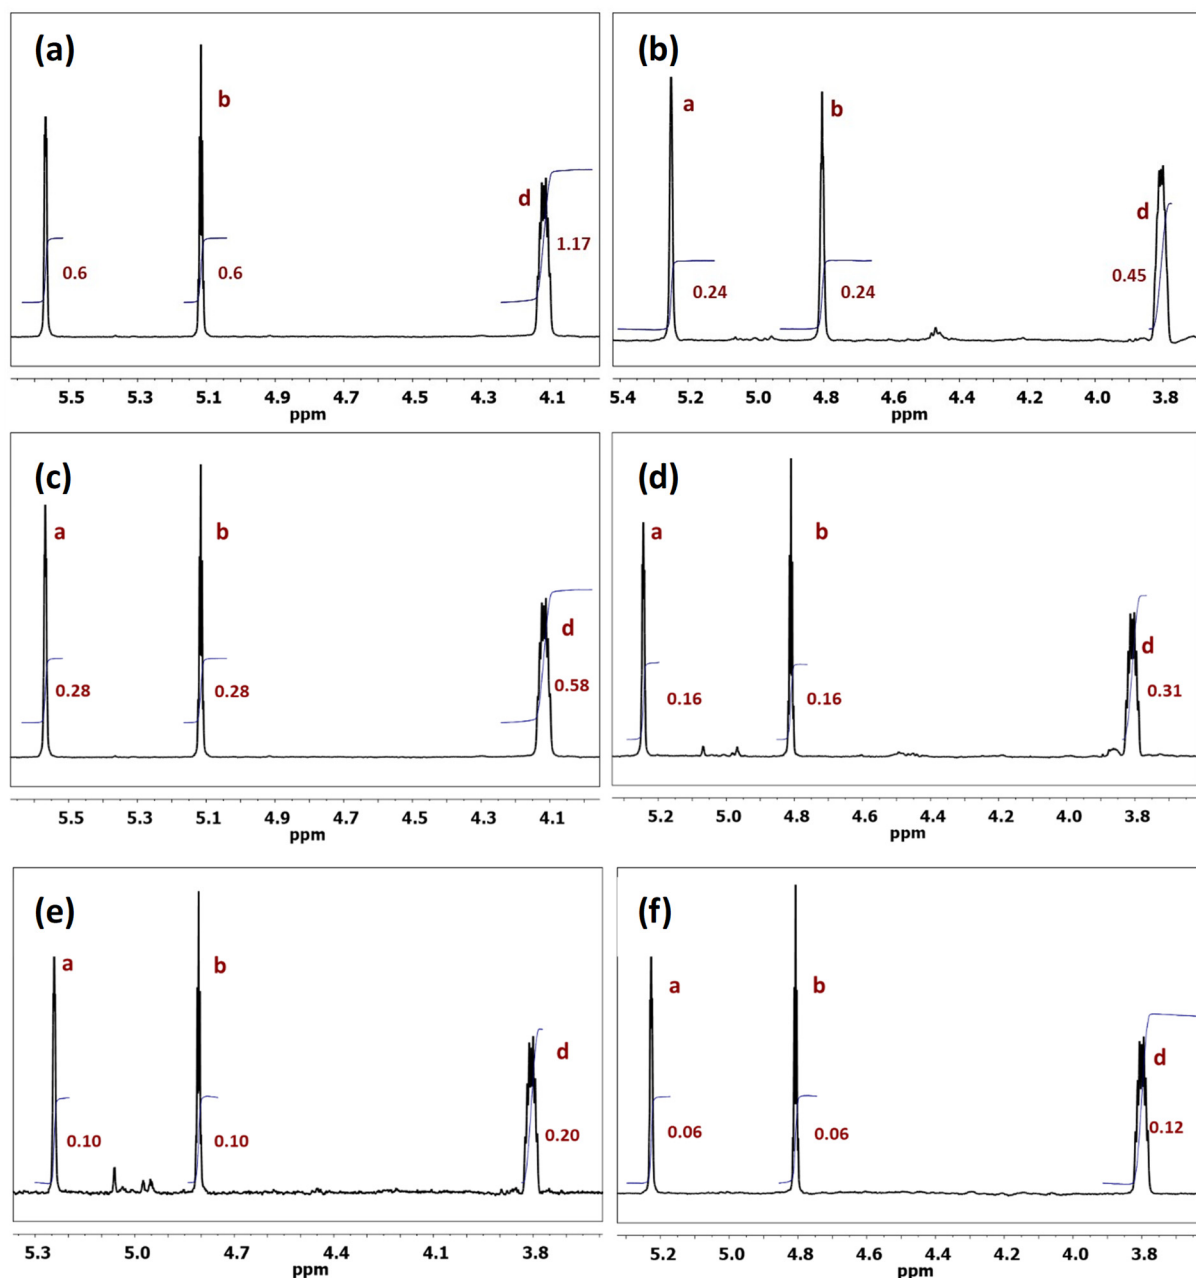

**Figure S2.**  $^1\text{H}$  NMR signals of vinyl protons of CNC-g-PTMAEMA 1 before (a) and after (b), CNC-g-PTMAEMA 2 before (c) and after (d), and CNC-g-PTMAEMA 3 before (e) and after (f) the reaction.

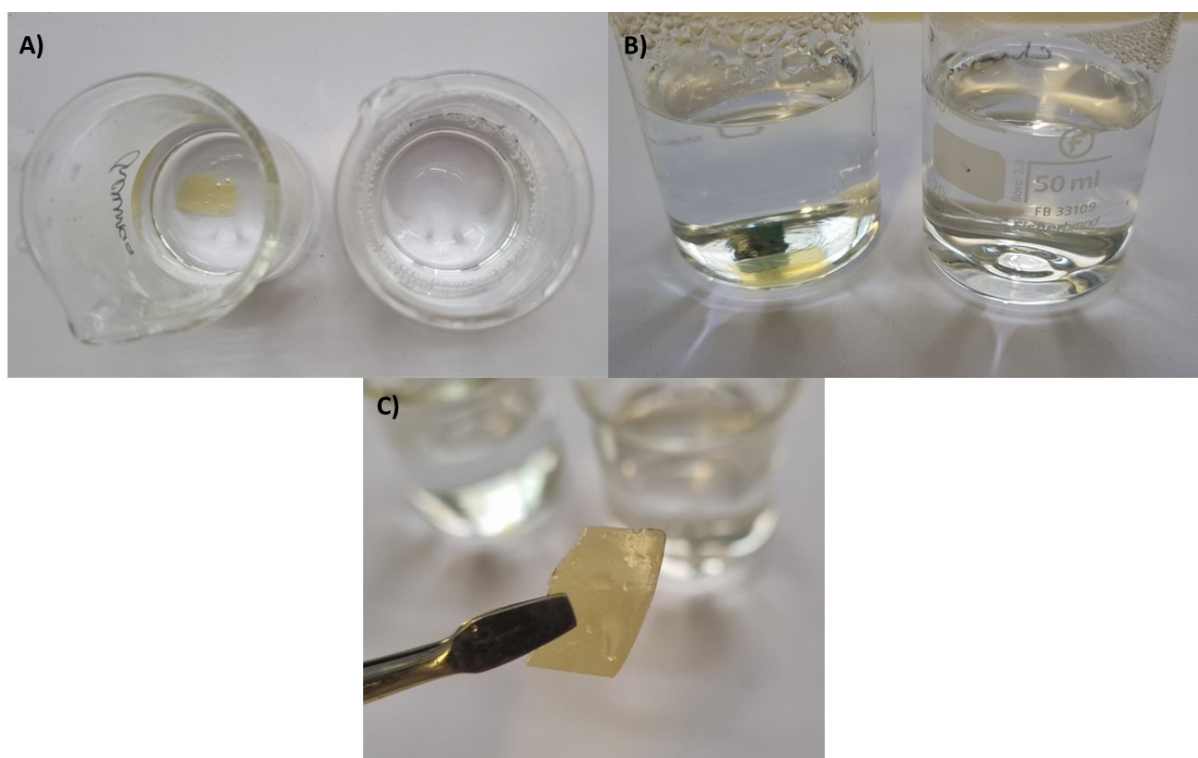

**Figure S3. A. and B. Digital images of CNC-g-PTMAEMA 1 film in water (left) and dispersed CNC film. C. CNC-g-PTMAEMA 1 film after several generation tests using sonication and methanol.**
